# Supplementary material for: A molecular dynamics study of structure, stability and fragmentation patterns of sodium bis(2-ethylhexyl)sulfosuccinate positively charged aggregates in vacuo
Source: Royal Society of Chemistry journal article supplement (doi:10.1039/c1cp21740b), 2011-01-01
Supplement: c1cp21740b.pdf [file c1cp21740b.pdf]

## SUPPLEMENTARY INFORMATION

# A Molecular Dynamics study of structure, stability and fragmentation patterns of Sodium bis(2-ethylhexyl)sulfosuccinate positively charged aggregates *in vacuo*

Giovanna Longhi,<sup>1,2</sup> Sergio Abbate,<sup>1,2</sup> Leopoldo Ceraulo,<sup>3</sup> Alberto Ceselli<sup>4</sup>, Sandro L. Fornili<sup>4</sup>,  
Vincenzo Turco Liveri<sup>5</sup>

<sup>1</sup>Dipartimento di Scienze Biomediche e Biotecnologie, Università di Brescia, Viale Europa 11,  
25123Brescia, Italy

<sup>2</sup>CNISM, Consorzio Interuniversitario Scienze Fisiche della Materia, Via della Vasca Navale 84, 00146  
Roma, Italy

<sup>3</sup>Dipartimento STeMBio, Via Archirafi 32, 90123 Palermo, Italy; Centro Grandi Apparecchiature,  
UniNetLAB, Via F. Marini 14, 90128 Palermo, Italy

<sup>4</sup>Dipartimento di Tecnologie dell'Informazione, Università di Milano, Via Bramante 65, 26013 Crema  
(CR), Italy

<sup>5</sup>Dipartimento di Chimica "S. Cannizzaro", Università degli Studi di Palermo, Viale delle Scienze  
Parco d'Orleans II, 90128 Palermo, Italy.

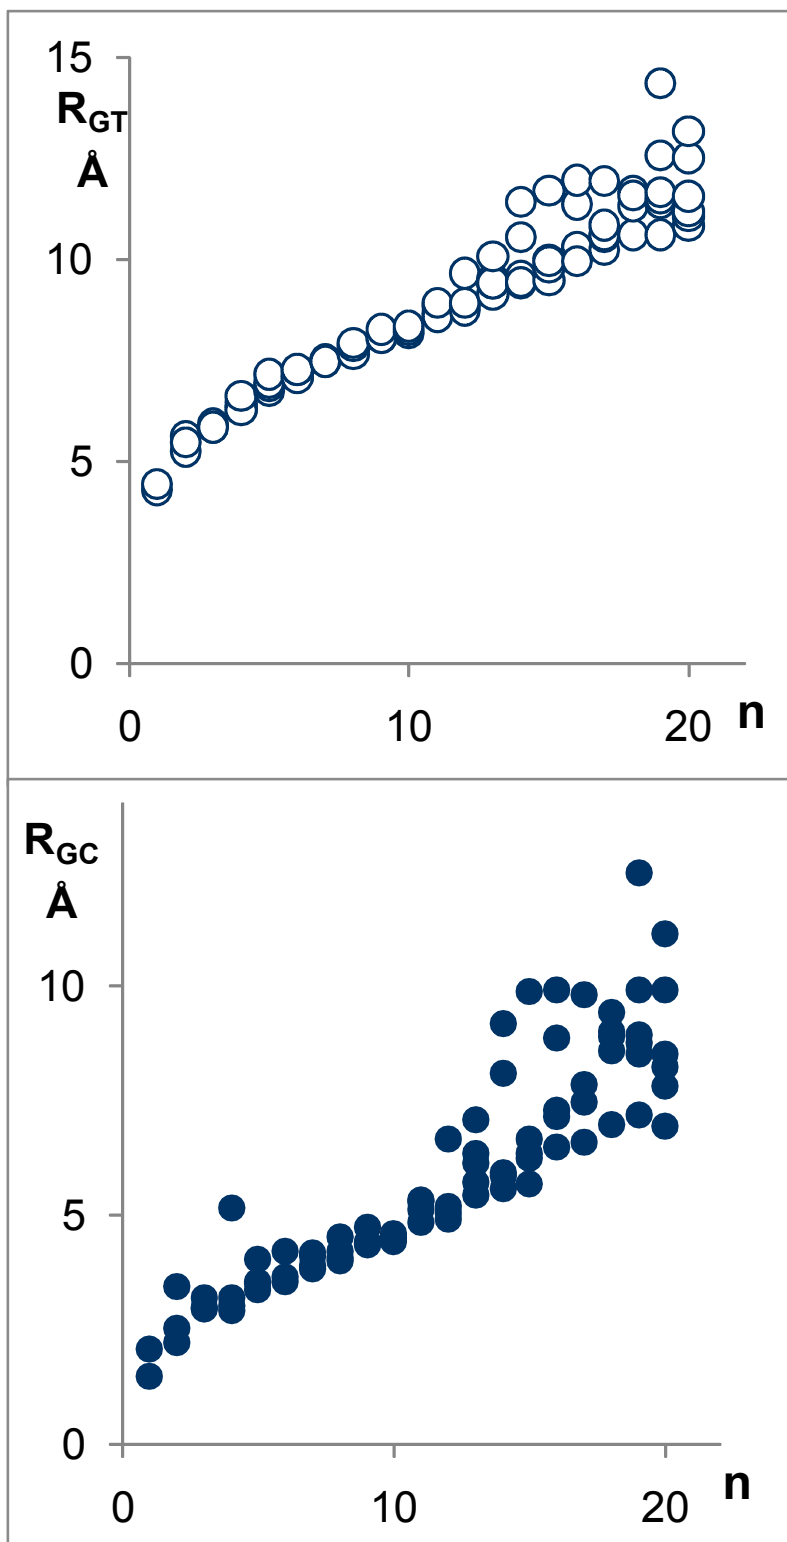

**Figure SI-1** gyration radius (Å) calculated for all atoms,  $R_{GT}$ , and for the core atoms,  $R_{GC}$ , for  $n=1-20$  for all possible charge values ( $n_c=0-n_{c,max}$ ).

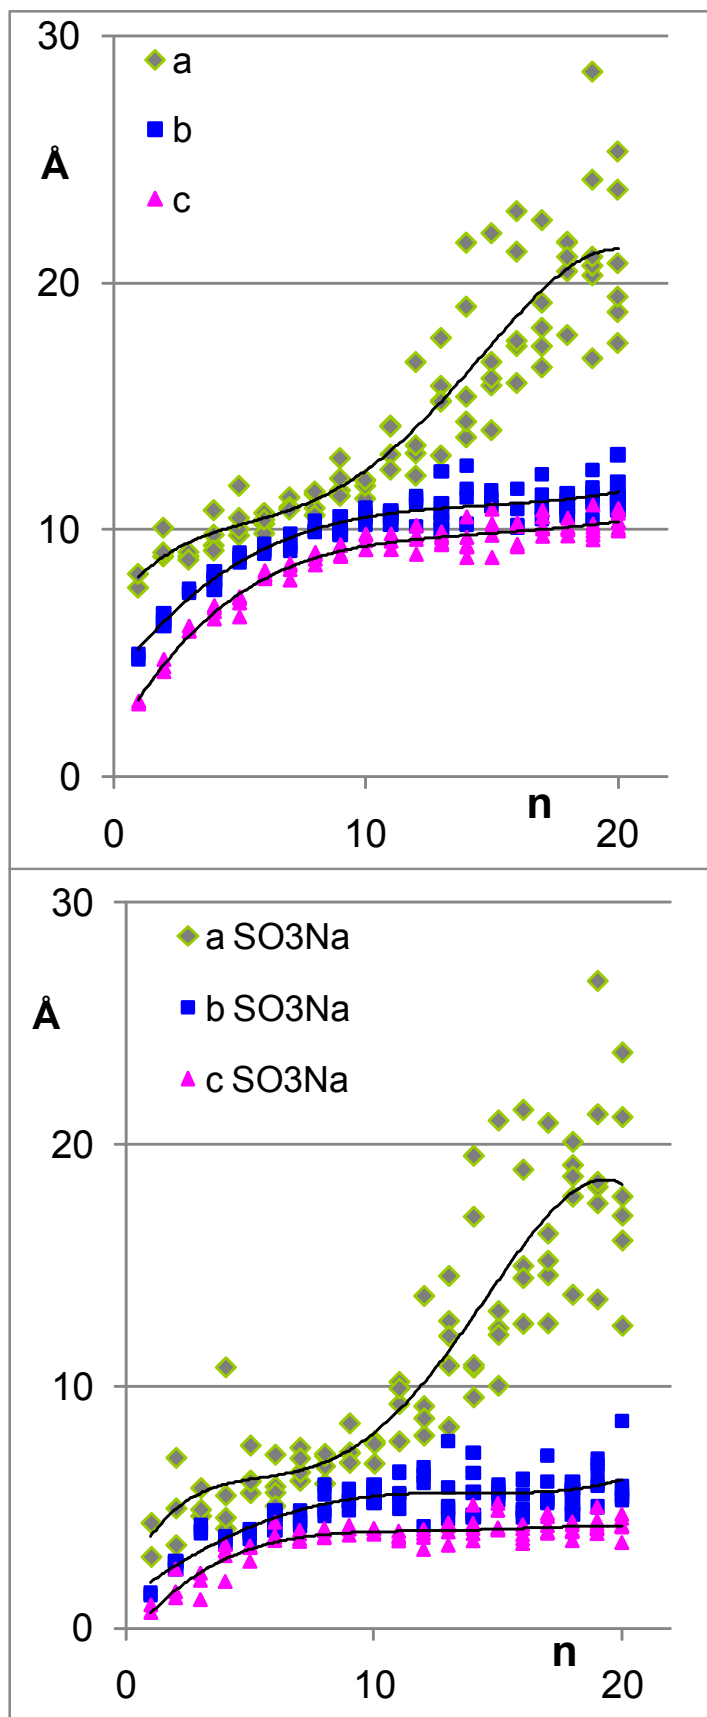

**Figure SI-2** Lengths of the three semi-axes  $a$   $b$   $c$  (Å) of the equivalent ellipsoid, calculated from inertia moments as explained in the text, for all atoms (*top*) and for the core atoms (SO<sub>3</sub>Na) (*bottom*) for all  $n$  and  $n_c$  values. Lines are added just as eye-guides.
